# Supplementary material for: Collagen-elastin microstructural network and its mechanical implications in the anterior cruciate ligament
Source: Research Square preprint supplement (doi:10.21203/rs.3.rs-8081591/v1), 2025-11-28
Supplement: Supplementary file 1 [file ea5df4e74a134b11d898b51f.docx]

***Supporting Information***


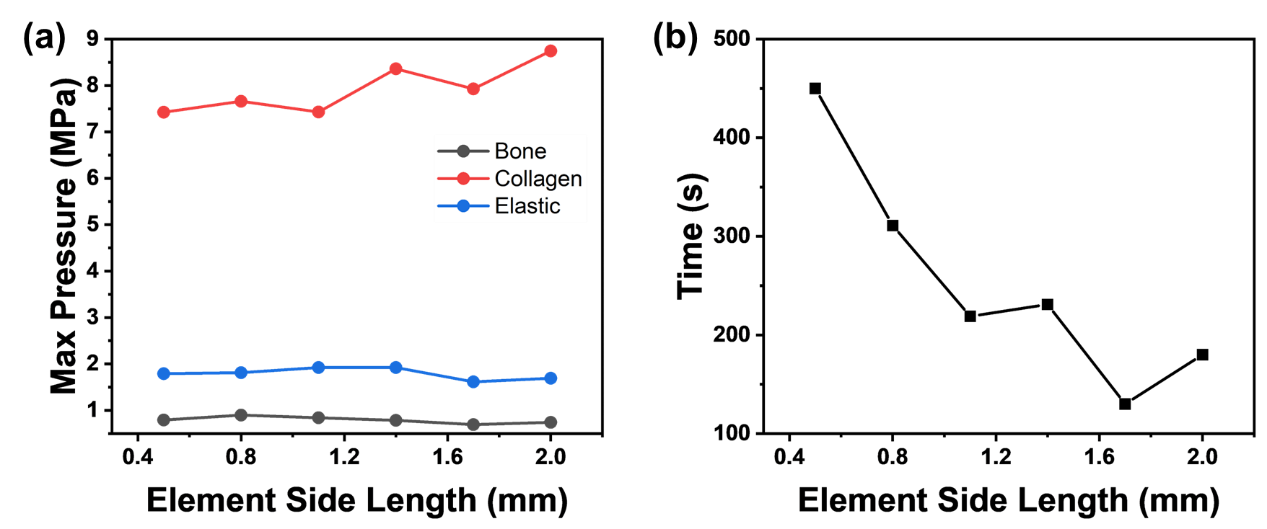


**Figure S1.** Mesh independence verification for tetrahedral elements of finite element analysis


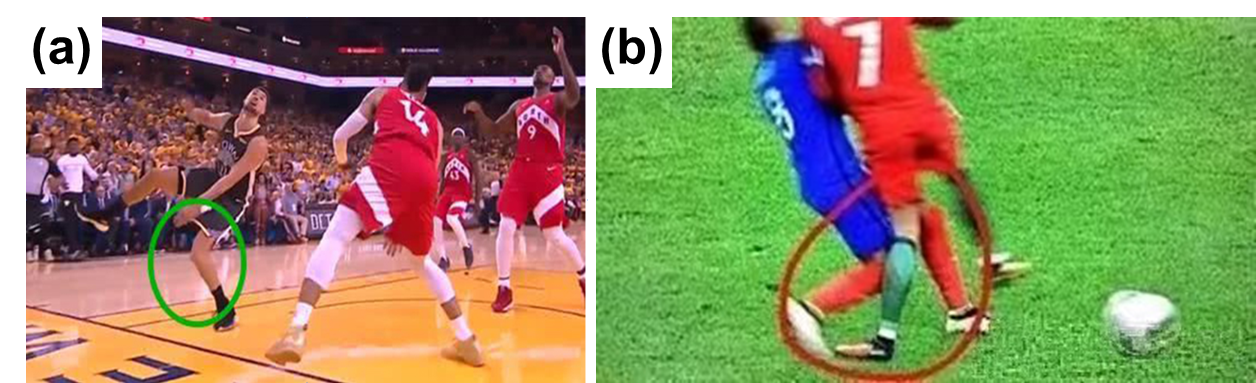


**Figure S2.** Photos of ACL injuries moment in the basketball and football court where often knee valgus, tibial internal rotation and anterior tibial translation were involved[[1](#_ENREF_1), [2](#_ENREF_2)]. After rough estimation, it was estimated that the ACL movements above were associated with 20~30° knee flexion, 20-30% tibial internal rotation, <15% anterior strain and < 5-10 mm shear displacement.


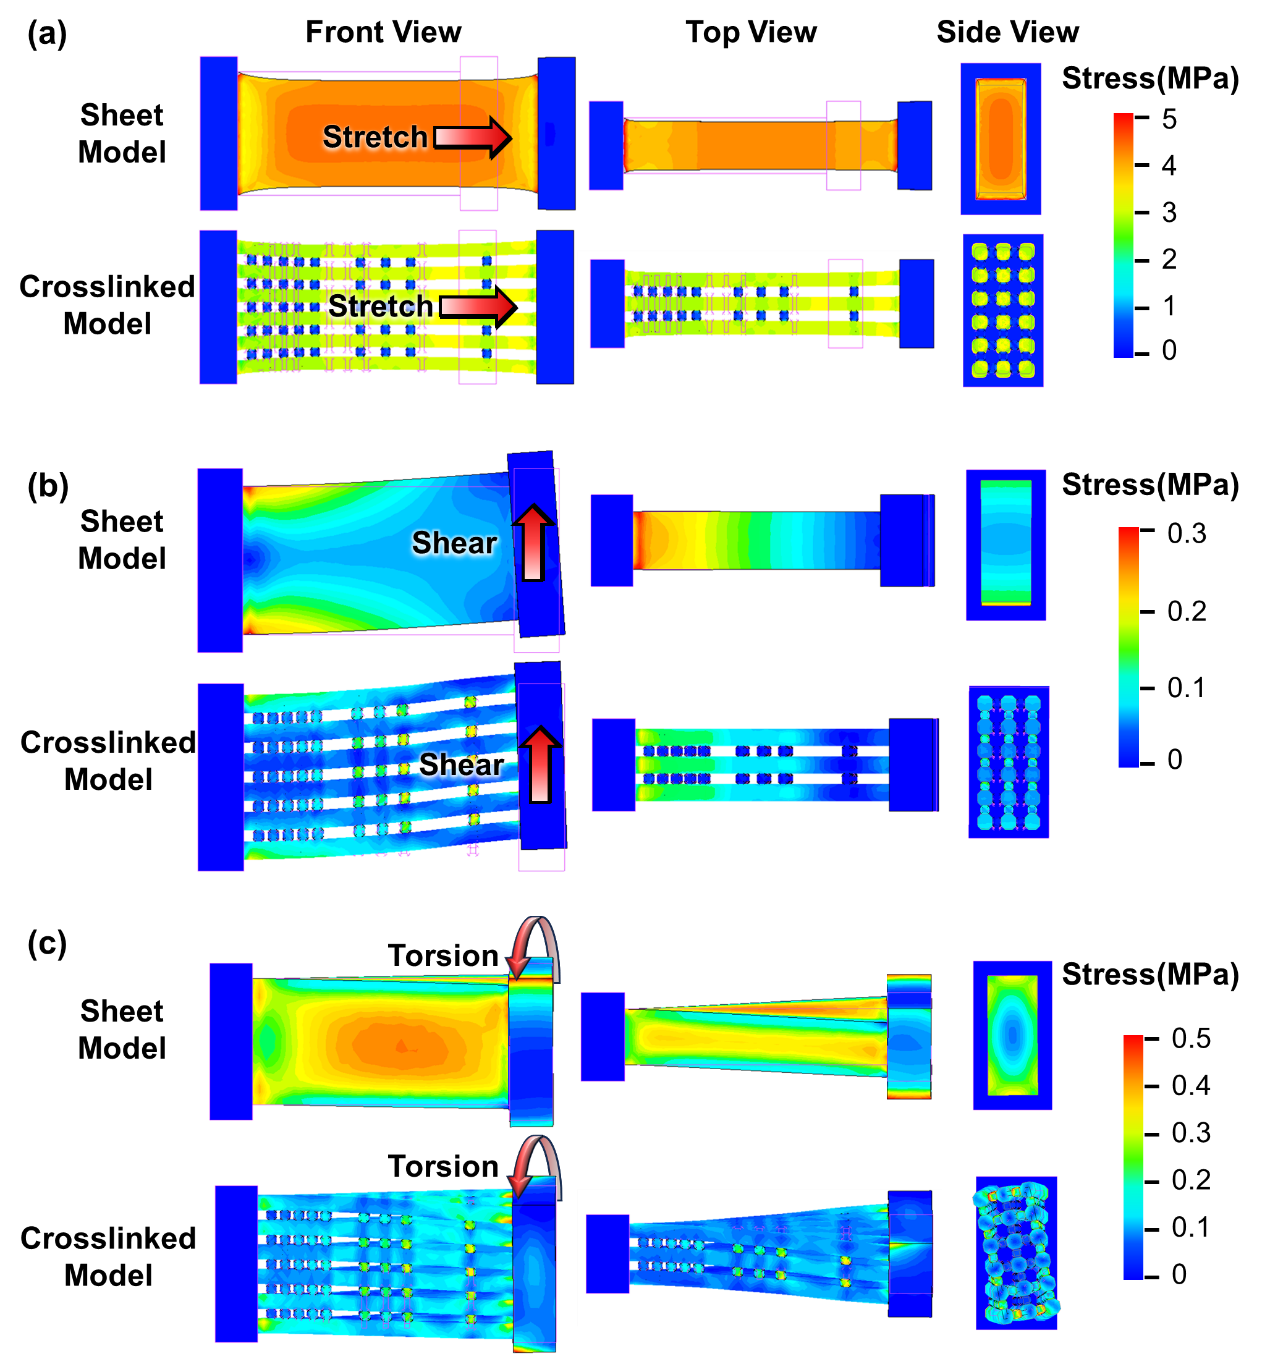


**Figure S3.** Finite element simulation mechanics simulation. (a) Three-view simulation results of tensile stress model; (b) Three-view simulation results of shear stress model; (c) Three-view simulation results of torsional stress model.


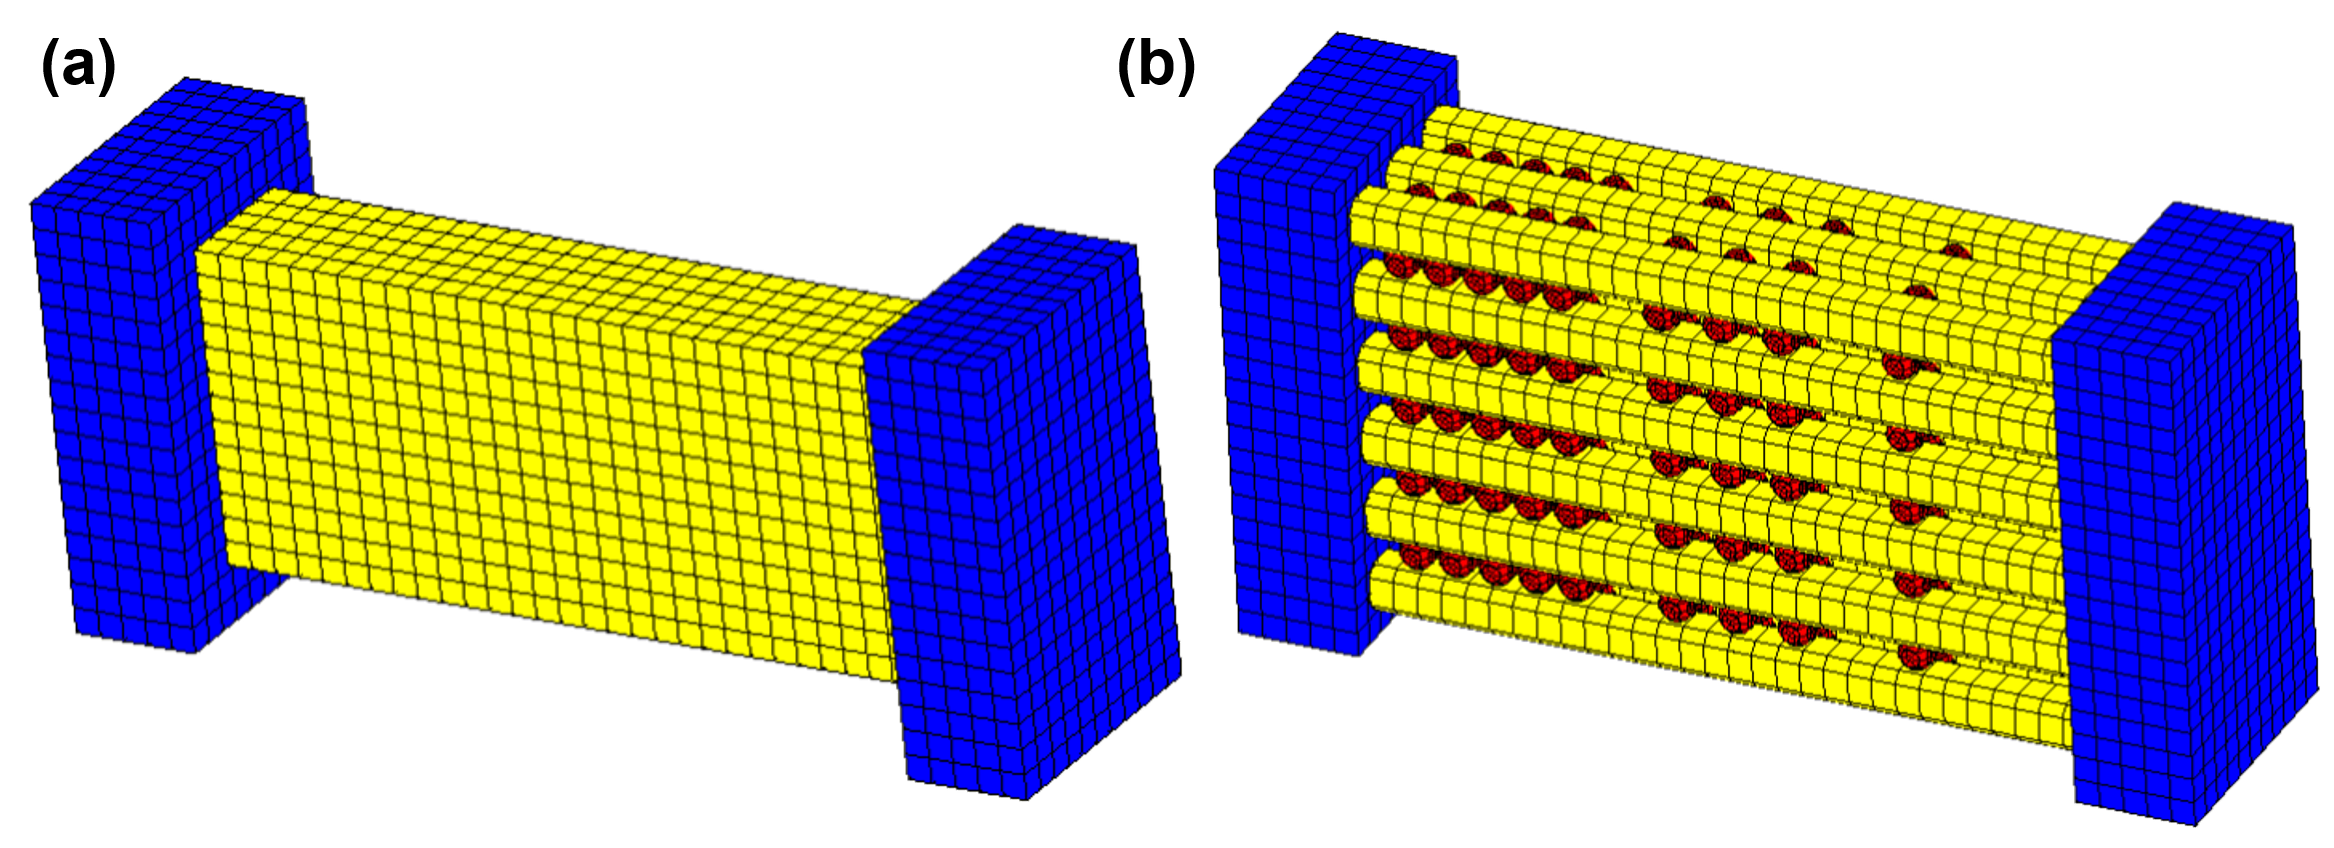


**Material properties and geometric parameters of two ACL models.**

| Type | Crosslinked Model | | Sheet Model | Bone |
| --- | --- | --- | --- | --- |
| **Collagen** | **Elastin** |
| Size (μm3) | 300×20×20 | 12×12×12 | 300×126×54 | 50×172×108 |

**Figure S4.** Finite element model at the micrometer scale. (a) Three-dimensional representation of sheet Model at the micrometer scale in mesh division; (b) Three-dimensional representation of crosslinked Model at the micrometer scale in mesh division


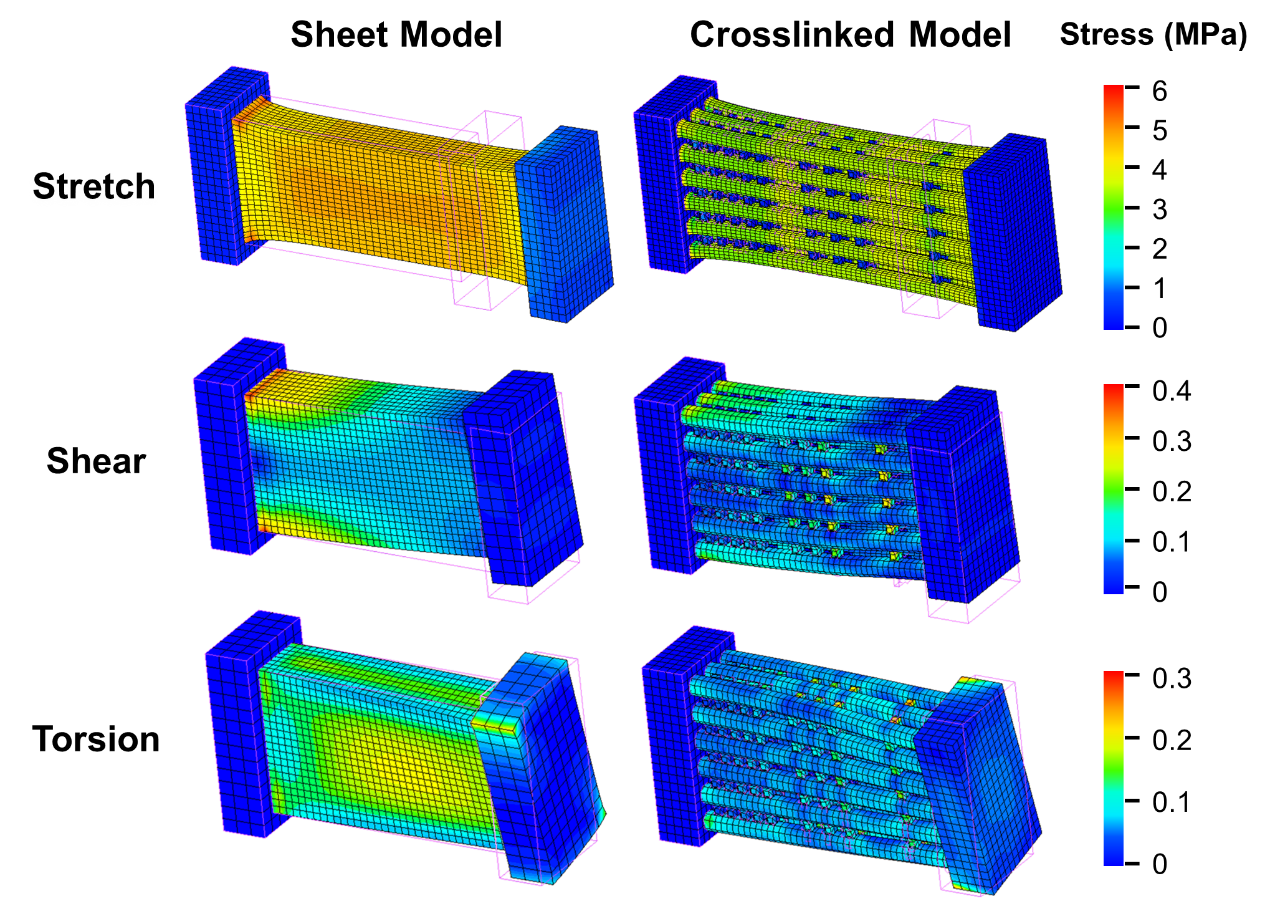


**Figure S5.** Three mechanical simulations of sheet model and crosslinked model at the micrometer scale


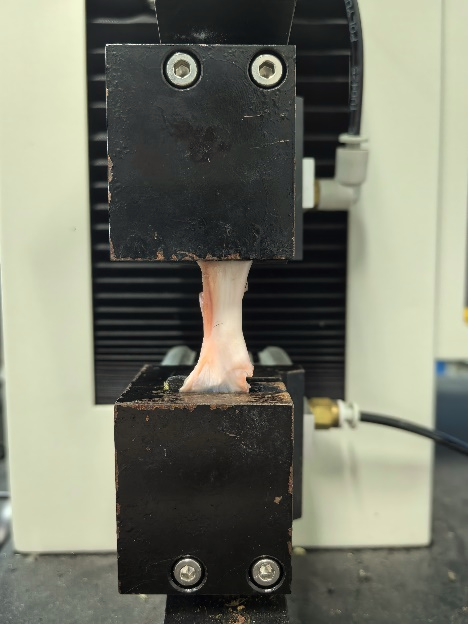


**Figure S6.** A photo of the mechanical test of ACL using a tensile testing machine.

**References**

1. Tosarelli F, Buckthorpe M, Paolo SD, Grassi A, Rodas G, Zaffagnini S, et al. Video Analysis of Anterior Cruciate Ligament Injuries in Male Professional Basketball Players: Injury Mechanisms, Situational Patterns, and Biomechanics. Orthop J Sports Med. 2024; 2024. <https://doi.org/10.1177/23259671241234880>.

2. Markolf KL, Du PZ,McAllister DR. Changes in knee kinematics from applied external Tibial torque: Implications for stabilizing an anterior cruciate ligament deficient knee. Clin Biomech. 2021; 81: 105230. <https://doi.org/10.1016/j.clinbiomech.2020.105230>.
